# Supplementary material
Source: PubMed Central journal article supplement (PMC10395540)
Supplement: NIHMS1753180-supplement-Supplemental_results.pdf [file NIHMS1753180-supplement-Supplemental_results.pdf]

# Supplemental Appendix of Results

---

## *Cost-effectiveness of HPV vaccination for adults through age 45 years in the United States: Estimates from a simplified transmission model*

Harrell W. Chesson<sup>1\*</sup>

Elissa Meites<sup>2</sup>

Donatus U. Ekwueme<sup>3</sup>

Mona Saraiya<sup>3</sup>

Lauri E. Markowitz<sup>2</sup>

<sup>1</sup>Division of STD Prevention, National Center for HIV/AIDS, Viral Hepatitis, STD, and TB Prevention, Centers for Disease Control and Prevention, Atlanta, Georgia, USA

<sup>2</sup>Division of Viral Diseases, National Center for Immunization and Respiratory Diseases, Centers for Disease Control and Prevention, Atlanta, Georgia, USA

<sup>3</sup>Division of Cancer Prevention and Control, National Center for Chronic Disease Prevention and Health Promotion, Centers for Disease Control and Prevention, Atlanta, Georgia, USA

The findings and conclusions in this report are those of the authors and do not necessarily represent the official position of the Centers for Disease Control and Prevention.

## Table of Contents

|                                                                                  |    |
|----------------------------------------------------------------------------------|----|
| 1. Detailed intermediate results from base case cost-effectiveness analysis..... | 3  |
| 2. Effects of model changes and updates.....                                     | 7  |
| 3. Influence of herd effects on model results.....                               | 9  |
| 4. Maximum cost and quality of life impact scenarios.....                        | 10 |

## 1. Detailed intermediate results from base case cost-effectiveness analysis

Supplement Table 1: Discounted number of disease cases averted and discounted number vaccinated, for comparison strategy and mid-adult vaccination through age 45 years.

|                      | Comparison strategy | Mid-adult vaccination | Difference |
|----------------------|---------------------|-----------------------|------------|
| CIN 1                | 1,323,558           | 1,332,328             | 8,770      |
| CIN 2/3              | 2,946,179           | 2,956,668             | 10,489     |
|                      |                     |                       |            |
| Cancer total         | 209,551             | 214,223               | 4,672      |
|                      |                     |                       |            |
| Female cancers       |                     |                       |            |
| Total                | 146,013             | 148,632               | 2,619      |
| Cervical             | 96,900              | 98,151                | 1,252      |
| Total (non-cervical) | 49,113              | 50,480                | 1,367      |
| Anal                 | 19,626              | 20,146                | 520        |
| Vaginal              | 3,737               | 3,855                 | 117        |
| Vulvar               | 14,474              | 14,891                | 418        |
| Oropharyngeal        | 11,277              | 11,589                | 312        |
|                      |                     |                       |            |
| Male cancers         | 63,538              | 65,592                | 2,053      |
| Anal                 | 10,022              | 10,304                | 282        |
| Oropharyngeal        | 49,465              | 51,075                | 1,610      |
| Penile               | 4,052               | 4,213                 | 161        |
|                      |                     |                       |            |
| Genital warts total  | 4,590,912           | 4,620,738             | 29,826     |
| Female               | 2,641,087           | 2,653,063             | 11,976     |
| Male                 | 1,949,826           | 1,967,675             | 17,849     |
|                      |                     |                       |            |
| JORRP                | 8,212               | 8,225                 | 13         |
| AORRP                | 6,663               | 6,758                 | 96         |
|                      |                     |                       |            |
| Number vaccinated    | 85,271,029          | 103,976,707           | 18,705,678 |

The comparison strategy column shows the impact of routine 9vHPV vaccination of 12-year-old females and males with catch-up vaccination through age 26 years for females and 21 years for males (versus no vaccination). The mid-adult column shows the impact of routine 9vHPV vaccination of 12-year-old females and males with catch-up vaccination through age 45 years for females and males (versus no vaccination).

CIN: cervical intraepithelial neoplasia.

AORRP: adult-onset recurrent respiratory papillomatosis.

JORRP: juvenile-onset recurrent respiratory papillomatosis.

Supplement Table 2: Number of disease cases averted and number vaccinated, for comparison strategy and mid-adult vaccination through age 45 years, NOT DISCOUNTED

|                      | Comparison strategy | Mid-adult vaccination | Difference |
|----------------------|---------------------|-----------------------|------------|
| CIN 1                | 6,231,118           | 6,258,287             | 27,169     |
| CIN 2/3              | 12,863,980          | 12,897,451            | 33,471     |
|                      |                     |                       |            |
| Cancer total         | 1,447,552           | 1,468,486             | 20,934     |
|                      |                     |                       |            |
| Female cancers       |                     |                       |            |
| Total                | 957,776             | 969,345               | 11,568     |
| Cervical             | 579,118             | 584,259               | 5,141      |
| Total (non-cervical) | 378,658             | 385,085               | 6,427      |
| Anal                 | 147,661             | 149,972               | 2,311      |
| Vaginal              | 30,573              | 31,172                | 599        |
| Vulvar               | 114,314             | 116,438               | 2,124      |
| Oropharyngeal        | 86,111              | 87,504                | 1,393      |
|                      |                     |                       |            |
| Male cancers         | 489,776             | 499,142               | 9,366      |
| Anal                 | 73,360              | 74,651                | 1,291      |
| Oropharyngeal        | 381,492             | 388,693               | 7,200      |
| Penile               | 34,924              | 35,798                | 875        |
|                      |                     |                       |            |
| Genital warts total  | 20,897,424          | 21,000,114            | 102,691    |
| Female               | 11,503,494          | 11,545,216            | 41,722     |
| Male                 | 9,393,930           | 9,454,898             | 60,968     |
|                      |                     |                       |            |
| JORRP                | 34,199              | 34,239                | 40         |
| AORRP                | 36,657              | 37,038                | 381        |
|                      |                     |                       |            |
| Number vaccinated    | 269,580,167         | 324,768,314           | 55,188,147 |

The comparison strategy column shows the impact of routine 9vHPV vaccination of 12-year-old females and males with catch-up vaccination through age 26 years for females and 21 years for males (versus no vaccination). The mid-adult column shows the impact of routine 9vHPV vaccination of 12-year-old females and males with catch-up vaccination through age 45 years for females and males (versus no vaccination).

CIN: cervical intraepithelial neoplasia.

AORRP: adult-onset recurrent respiratory papillomatosis.

JORRP: juvenile-onset recurrent respiratory papillomatosis.

Supplement Table 3: Detailed cost-effectiveness results, comparison strategy versus no vaccination

|                                             | Discounted costs averted     | Discounted QALYs gained |
|---------------------------------------------|------------------------------|-------------------------|
| CIN 1 due to HPV 16, 18, 31, 33, 45, 52, 58 | \$1,540,361,623              | 7,757                   |
| CIN 1 due to HPV 6, 11                      | \$299,383,740                | 1,508                   |
| CIN 2/3                                     | \$7,542,217,633              | 29,462                  |
| AORRP (women)                               | \$237,042,753                | 1,658                   |
| Cervical cancer                             | \$7,054,290,213              | 497,441                 |
| Genital warts (female)                      | \$2,271,334,557              | 63,386                  |
| Anal cancer (women)                         | \$1,836,991,688              | 80,584                  |
| Vaginal cancer                              | \$435,367,119                | 18,301                  |
| Vulvar cancer                               | \$743,942,023                | 54,058                  |
| Oropharyngeal cancer (women)                | \$1,426,519,641              | 60,314                  |
| JORRP                                       | \$1,226,104,982              | 8,623                   |
|                                             |                              |                         |
| Warts (male)                                | \$1,676,850,012              | 46,796                  |
| Anal cancer (men)                           | \$938,044,656                | 53,913                  |
| Oropharyngeal cancer (men)                  | \$6,257,288,487              | 207,357                 |
| Penile cancer                               | \$89,950,559                 | 13,624                  |
| AORRP (men)                                 | \$210,682,693                | 1,474                   |
|                                             |                              |                         |
| Number of females vaccinated (discounted)   | Discounted number vaccinated |                         |
| Ages 12 to 14 years                         | 28,371,862                   |                         |
| Ages 15 to 18 years                         | 16,741,890                   |                         |
| Ages 19+ years                              | 5,594,515                    |                         |
|                                             |                              |                         |
| Number of males vaccinated (discounted)     | Discounted number vaccinated |                         |
| Ages 12 to 14 years                         | 21,067,226                   |                         |
| Ages 15 to 18 years                         | 11,978,586                   |                         |
| Ages 19+ years                              | 1,516,950                    |                         |
|                                             | Discounted cost              |                         |
| Vaccination costs female                    | \$26,671,995,164             |                         |
| Vaccination costs male                      | \$17,633,986,990             |                         |
| Total vaccination costs                     | \$44,305,982,154             |                         |

This table shows the costs and number of QALYs gained by the comparison strategy (routine 9vHPV vaccination of 12-year-old females and males with catch-up vaccination through age 26 years for females and 21 years for males) versus no vaccination. The costs averted and QALYs saved by preventing JORRP include all children and are not stratified by sex.

CIN: cervical intraepithelial neoplasia.

AORRP: adult-onset recurrent respiratory papillomatosis.

JORRP: juvenile-onset recurrent respiratory papillomatosis.

QALY: quality-adjusted life year.

Supplement Table 4: Detailed cost-effectiveness results, mid-adult vaccination versus no vaccination

|                                             | Discounted costs averted     | Discounted QALYs gained |
|---------------------------------------------|------------------------------|-------------------------|
| CIN 1 due to HPV 16, 18, 31, 33, 45, 52, 58 | \$1,550,563,922              | 7,809                   |
| CIN 1 due to HPV 6, 11                      | \$301,371,338                | 1,518                   |
| CIN 2/3                                     | \$7,569,070,423              | 29,567                  |
| AORRP (women)                               | \$240,068,060                | 1,679                   |
| Cervical cancer                             | \$7,145,427,387              | 503,230                 |
| Genital warts (female)                      | \$2,281,634,106              | 63,674                  |
| Anal cancer (women)                         | \$1,885,629,704              | 82,419                  |
| Vaginal cancer                              | \$449,050,800                | 18,781                  |
| Vulvar cancer                               | \$765,407,357                | 55,416                  |
| Oropharyngeal cancer (women)                | \$1,465,987,704              | 61,728                  |
| JORRP                                       | \$1,227,991,106              | 8,636                   |
|                                             |                              |                         |
| Warts (male)                                | \$1,692,200,485              | 47,224                  |
| Anal cancer (men)                           | \$964,461,632                | 55,136                  |
| Oropharyngeal cancer (men)                  | \$6,460,962,799              | 213,512                 |
| Penile cancer                               | \$93,526,350                 | 14,075                  |
| AORRP (men)                                 | \$214,101,097                | 1,497                   |
|                                             |                              |                         |
| Number of females vaccinated (discounted)   | Discounted number vaccinated |                         |
| Ages 12 to 14 years                         | 28,371,862                   |                         |
| Ages 15 to 18 years                         | 16,741,890                   |                         |
| Ages 19+ years                              | 13,792,966                   |                         |
|                                             |                              |                         |
| Number of males vaccinated (discounted)     | Discounted number vaccinated |                         |
| Ages 12 to 14 years                         | 21,067,226                   |                         |
| Ages 15 to 18 years                         | 11,978,586                   |                         |
| Ages 19+ years                              | 12,024,176                   |                         |
|                                             | Discounted cost              |                         |
| Vaccination costs female                    | \$32,525,689,698             |                         |
| Vaccination costs male                      | \$25,136,146,226             |                         |
| Total vaccination costs                     | \$57,661,835,924             |                         |

This table shows the costs and number of QALYs gained by the mid-adult vaccination strategy (routine 9vHPV vaccination of 12-year-old females and males with catch-up vaccination through age 45 years for females and males) versus no vaccination. The costs averted and QALYs saved by preventing JORRP include all children and are not stratified by sex.

CIN: cervical intraepithelial neoplasia.

AORRP: adult-onset recurrent respiratory papillomatosis.

JORRP: juvenile-onset recurrent respiratory papillomatosis.

QALY: quality-adjusted life year.

## 2. Effects of model changes and updates

As described in the Technical Appendix, this 2019 application of the model incorporates four main changes and updates from the 2018 application: (1) updated vaccine cost assumptions and medical treatment costs assumptions; (2) modifying the model to more closely approximate scenarios in which there is re-infection with HPV; (3) adding adult-onset recurrent respiratory papillomatosis (AORRP) as a potential outcome prevented by HPV vaccination; and (4) applied modified (and generally higher) incidence rates of cervical intraepithelial neoplasia (CIN).

In this section, we show how these adjustments affect the estimated cost-effectiveness of mid-adult vaccination. To illustrate the effects of these model adjustments more clearly, we separated the effects of the vaccine cost change and the medical treatment cost updates.

Supplement Table 5: Cost per quality-adjusted life year (QALY) gained by mid-adult vaccination strategies when applying 2018 model and when sequentially applying the main adjustments to the 2018 model.

| Strategy                                 | (1) 2018 model without any changes | (2) 2018 model, plus updated vaccine costs | (3) 2018 model, plus updated vaccine costs and treatment costs | (4) 2018 model, plus updated vaccine costs and treatment costs, plus modification for re-infection | (5) 2018 model, plus updated vaccine costs and treatment costs, plus modification for re-infection, plus AORRP | (6) 2019 model [2018 model plus updated vaccine costs and treatment costs, plus modification for re-infection, plus AORRP, plus CIN incidence adjustment] |
|------------------------------------------|------------------------------------|--------------------------------------------|----------------------------------------------------------------|----------------------------------------------------------------------------------------------------|----------------------------------------------------------------------------------------------------------------|-----------------------------------------------------------------------------------------------------------------------------------------------------------|
| Comparison strategy (vs. no vaccination) | \$16,400                           | \$24,100                                   | \$14,100                                                       | \$12,600                                                                                           | \$12,100                                                                                                       | \$9,200                                                                                                                                                   |
| Age 30 (vs. comparison strategy)         | \$417,600                          | \$575,800                                  | \$562,500                                                      | \$592,600                                                                                          | \$590,700                                                                                                      | \$587,600                                                                                                                                                 |
| Age 45 (vs. comparison strategy)         | \$545,000                          | \$750,000                                  | \$736,500                                                      | \$657,500                                                                                          | \$655,700                                                                                                      | \$653,300                                                                                                                                                 |

The comparison strategy is routine 9vHPV vaccination of 12-year-old females and males with catch-up vaccination through age 26 years for females and 21 years for males. The mid-adult vaccination strategies include routine 9vHPV vaccination of 12-year-old females and males with catch-up vaccination through the given age (30, 35, 40, or 45 years) for females and males. For example, the “Age 30 (vs. comparison strategy)” row shows the incremental cost effectiveness of expanding vaccination to include mid-adults through age 30 years. In this example, the mid-adult strategy through age 30 years is routine 9vHPV vaccination of 12-year-old females and males with catch-up vaccination through age 30 years for females and males, and the comparison strategy is routine 9vHPV vaccination of 12-year-old females and males with catch-up vaccination through age 26 years for females and 21 years for males.

CIN: cervical intraepithelial neoplasia

AORRP: adult-onset recurrent respiratory papillomatosis



### 3. Influence of herd effects on model results

As described in the Technical Appendix, we use a relatively simple approach to approximate HPV transmission dynamics after the onset of HPV vaccination. To examine the potential effects of our simplified model approximations of transmission dynamics, we conducted a supplemental analysis in which we assumed HPV vaccination would not have any effect on HPV transmission dynamics. In this scenario, the only benefits of HPV vaccination were the direct benefits to those vaccinated. The idea behind this supplemental analysis is that (1) the indirect benefits to mid-adults and others through HPV vaccination in the comparison strategy likely far outweighs the marginal indirect benefits to mid-adults and others when expanding vaccination to include mid-adults. By removing the indirect effects from the model, we examine a scenario that is likely more favorable towards mid-adult vaccination. So, if our simple approach to HPV transmission dynamics is biased against mid-adult vaccination, this approach provides us with a reasonable bound of the potential effect of this bias on the estimated cost-effectiveness of mid-adult vaccination.

Supplement Table 6: Cost per quality-adjusted life year (QALY) gained by mid-adult vaccination strategies when excluding indirect effects\*

| <b>Vaccination strategy</b>                                          | <b>Cost per QALY gained</b> |
|----------------------------------------------------------------------|-----------------------------|
| Comparison strategy (vs. no vaccination)                             | \$25,800                    |
| Mid-adult vaccination through age 30 years (vs. comparison strategy) | \$204,800                   |
| Mid-adult vaccination through age 45 years (vs. comparison strategy) | \$463,300                   |

\*In this scenario, there are no “herd effects,” therefore in the vaccination scenarios, unvaccinated people have the same annual probability of acquiring HPV as they do in the “no vaccination” scenario.

The comparison strategy is routine 9vHPV vaccination of 12-year-old females and males with catch-up vaccination through age 26 years for females and 21 years for males. The mid-adult vaccination strategies include routine 9vHPV vaccination of 12-year-old females and males with catch-up vaccination through the given age (30, 35, 40, or 45 years) for females and males.

#### 4. Maximum cost and quality of life impact scenarios

In this scenario, we apply the medical treatment cost assumptions and quality of life impact assumptions most favorable to vaccination. That is, we apply the upper bound values for the medical treatment costs per case of each HPV health outcome. Simultaneously, we apply the upper bound values for the number of quality-adjusted life years (QALYs) lost per HPV health outcome.

We first examine the maximum cost and quality of life assumptions when keeping all other parameter values at their base case values. We then examine the maximum cost and quality of life assumptions under the “Increased HPV incidence for ages 30 years and older” scenario as described in the manuscript and Technical Appendix. In the “Increased HPV incidence for ages 30 years and older” scenario, HPV incidence rates do not decline from age 30 years through age 45 years and decline by 25% from age 45 years to age 60 years. For example, in the base case, the annual probability of acquiring HPV 16 in the absence of vaccination is 1.41% at age 30 years, 0.55% at age 40 years, 0.41% at age 50 years, and 0.34% at age 60 years. In the scenario of increased incidence for ages 30 years and older, the annual probability of acquiring HPV 16 in the absence of vaccination is 1.41% at age 30 years, 1.41% at age 40 years, 1.29% at age 50 years, and 1.06% at age 60 years.

Supplement Table 7: Cost per quality-adjusted life year (QALY) gained by mid-adult vaccination strategies when applying upper bound values for the medical treatment costs per case and the number of QALYs lost per case

| Vaccination strategy                                                 | Cost per QALY gained    |                                                     |
|----------------------------------------------------------------------|-------------------------|-----------------------------------------------------|
|                                                                      | Base case HPV incidence | Increased HPV incidence for ages 30 years and older |
| Comparison strategy (vs. no vaccination)                             | < 0 (cost-saving)       | < 0 (cost-saving)                                   |
| Mid-adult vaccination through age 30 years (vs. comparison strategy) | \$362,900               | \$251,100                                           |
| Mid-adult vaccination through age 45 years (vs. comparison strategy) | \$431,400               | \$213,500                                           |

In the “Base case HPV incidence” column, all model parameters are set to their base case values except the medical treatment costs per case and the number of QALYs lost per case. In the “Increased HPV incidence for ages 30 years and older” column, all model parameters are set to their base case values except the medical treatment costs per case, the number of QALYs lost per case, and the annual probabilities of HPV acquisition.
